# Supplementary material for: A Three-Way Authentication Protocol for Public Access Wireless Networks.
Source: Royal Society of Chemistry journal article supplement (doi:10.1039/c8bm01640b), 2004-01-01
Supplement: c8bm01640b1.pdf [file c8bm01640b1.pdf]

## Supplementary Information

# pH-responsive polymeric nanocarriers for efficient killing of cariogenic bacteria in biofilms

Zhouxiang Zhao,<sup>†a</sup> Chunmei Ding,<sup>†a</sup> Yaqin Wang,<sup>a</sup> Hong Tan<sup>a</sup> and Jianshu Li<sup>\*a,b</sup>

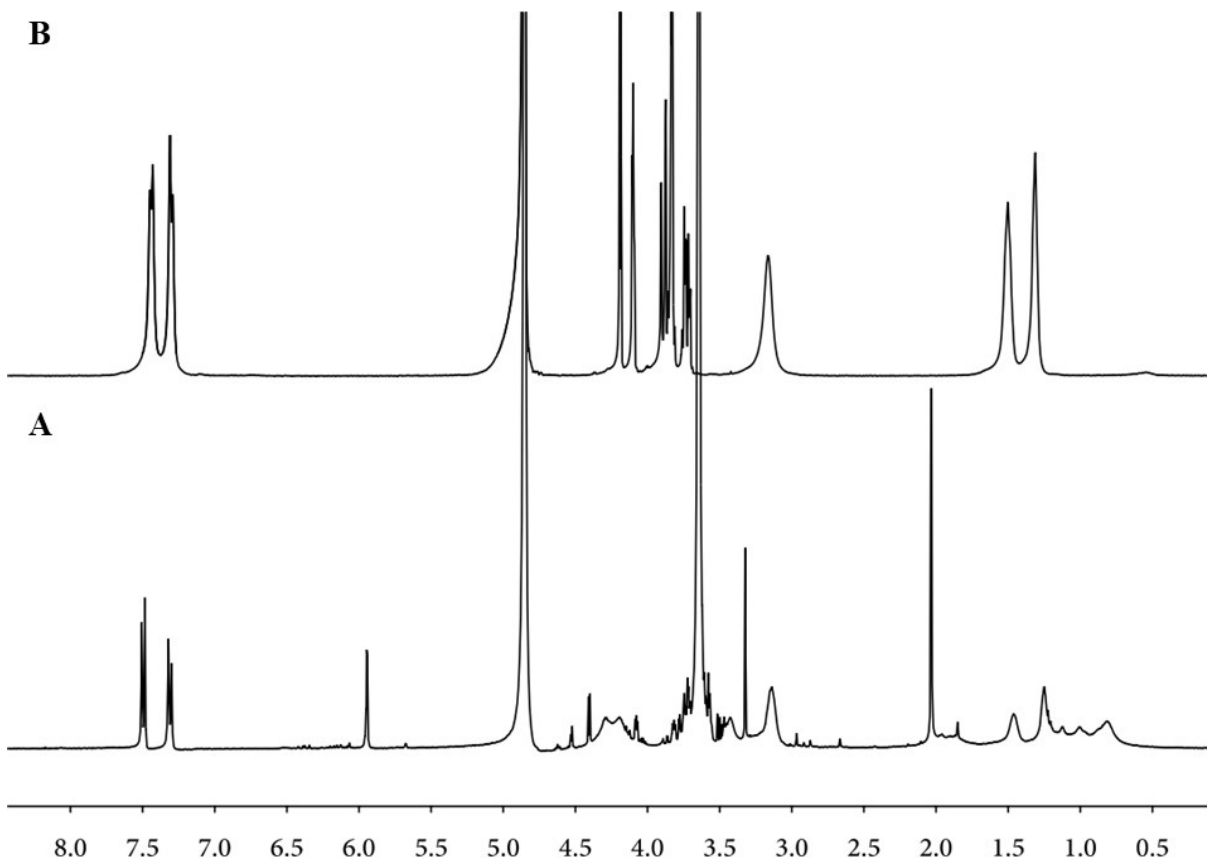

**Fig. S1** <sup>1</sup>H NMR spectra of CA-PICMs (A) in D<sub>2</sub>O + DCl and chlorhexidine digluconate (B) in D<sub>2</sub>O.

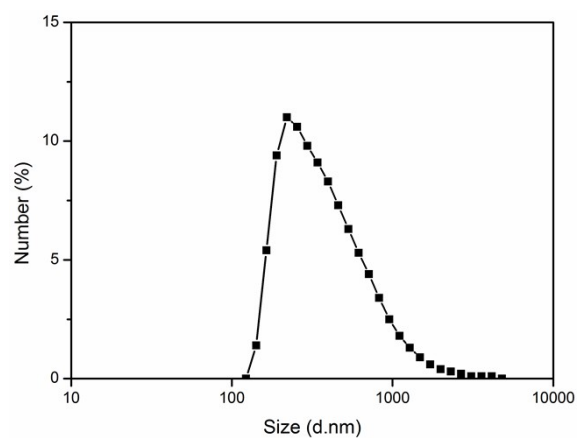

**Fig. S2** The number distribution of the nanoparticle formed by self-assembly of PEG-*b*-PAECOEMA. PEG-*b*-PAECOEMA was dissolved in UPW and stirred for 24 h.

**Table S1** Minimum inhibitory concentration (MIC) and minimum bactericidal concentration (MBC) values of CHX, SA-PICMs and CA-PICMs against *Streptococcus mutans*

| Sample   | MIC ( $\mu\text{g/mL}$ ) | MBC ( $\mu\text{g/mL}$ ) |
|----------|--------------------------|--------------------------|
| CHX      | 2                        | 4                        |
| SA-PICMs | 16                       | 32                       |
| CA-PICMs | 16                       | 16                       |
